# Supplementary material for: Artificial Neural Networks Elucidated the Essential Role of Mineral Nutrients versus Vitamins and Plant Growth Regulators in Achieving Healthy Micropropagated Plants
Source: MDPI journal article supplement (doi:10.3390/plants11101284), 2022-05-11
Supplement: s1 [file s1]

**Table S1.** Ranges (mM and mg L<sup>-1</sup>) and meaning of the levels (Low, Mid, and High) after the fuzzification process by neurofuzzy logic software.

|                                       | 2 levels |         |         | 3 levels |         |         |         | 4 levels |       |       |      |        |
|---------------------------------------|----------|---------|---------|----------|---------|---------|---------|----------|-------|-------|------|--------|
|                                       | Low      |         | High    | Low      | Mid     |         | High    | Low_1    | Mid_2 | Mid_3 |      | High_4 |
| NH <sub>4</sub> <sup>+</sup> (mM)     | 4.12     | 12.37   | 20.61   | 4.12     | 8.25    | 16.49   | 20.61   | 0.75     | 2.81  | 5.89  | 7.95 | 8.98   |
| NO <sub>3</sub> <sup>-</sup> (mM)     | 6.00     | 22.71   | 39.41   | 6.00     | 14.35   | 31.06   | 39.41   |          |       |       |      |        |
| K <sup>+</sup> (mM)                   | 2.19     | 12.37   | 22.55   | 2.19     | 7.28    | 17.46   | 22.55   |          |       |       |      |        |
| Ca <sup>2+</sup> (mM)                 |          |         |         |          |         |         |         |          |       |       |      |        |
| Mg <sup>2+</sup> (mM)                 | 0.38     | 2.44    | 4.50    |          |         |         |         |          |       |       |      |        |
| PO <sub>4</sub> <sup>3-</sup> (mM)    |          |         |         |          |         |         |         | 0.31     | 0.74  | 1.60  | 2.89 | 3.75   |
| SO <sub>4</sub> <sup>2-</sup> (mM)    | 0.49     | 2.85    | 5.20    | 0.49     | 1.67    | 4.02    | 5.20    |          |       |       |      |        |
| Fe <sup>2+</sup> /EDTA (mM)           | 0.10     | 0.30    | 0.50    | 0.10     | 0.20    | 0.40    | 0.50    |          |       |       |      |        |
| BO <sub>3</sub> <sup>-</sup> (mM)     |          |         |         | 0.01     | 0.05    | 0.12    | 0.15    |          |       |       |      |        |
| MoO <sub>4</sub> <sup>2-</sup> (mM)   |          |         |         | 0.0001   | 0.0005  | 0.0012  | 0.0015  |          |       |       |      |        |
| Na <sup>+</sup> (mM)                  | 0.20     | 0.60    | 1.00    | 0.20     | 0.40    | 0.80    | 1.00    |          |       |       |      |        |
| Co <sup>2+</sup> (mM)                 | 0.00001  | 0.00008 | 0.00016 | 0.00001  | 0.00005 | 0.00012 | 0.00016 |          |       |       |      |        |
| I <sup>-</sup> (mM)                   | 0.0005   | 0.0040  | 0.0075  |          |         |         |         |          |       |       |      |        |
| Myo (mg L <sup>-1</sup> )             | 0.0      | 500.0   | 1000.0  |          |         |         |         |          |       |       |      |        |
| Vit. E (mg L <sup>-1</sup> )          | 0.0      | 0.5     | 1.0     |          |         |         |         |          |       |       |      |        |
| GA <sub>3</sub> (mg L <sup>-1</sup> ) | 0.00     | 0.50    | 1.00    | 0.00     | 0.25    | 0.75    | 1.00    |          |       |       |      |        |
| BAP (mg L <sup>-1</sup> )             | 0.50     | 1.50    | 2.50    |          |         |         |         | 0.50     | 1.00  | 1.75  | 2.25 | 2.50   |

**Table S2.** Design Expert®'s five-factor design including 33 model points, and MS media as controls, for the mineral nutrient and vitamin experiments; and the 20 combinations of BAP and GA<sub>3</sub> of the PGR experimental design. Concentrations expressed as × MS.

| 1                   | 2          | Factor 1                        | Factor 2         | Factor 3 | Factor 4 | Factor 5 |
|---------------------|------------|---------------------------------|------------------|----------|----------|----------|
| Experimental design | Treatments | NH <sub>4</sub> NO <sub>3</sub> | KNO <sub>3</sub> | Mesos    | Micros   | Iron     |
|                     | 1          | 0.51                            | 0.66             | 1.65     | 1.50     | 3.04     |
|                     | 2          | 1.00                            | 0.66             | 2.59     | 0.10     | 1.00     |
|                     | 3          | 1.00                            | 1.00             | 2.37     | 1.50     | 1.08     |
|                     | 4          | 0.20                            | 0.24             | 3.00     | 0.97     | 1.84     |
|                     | 5          | 0.90                            | 0.10             | 0.25     | 0.10     | 1.60     |
|                     | 6          | 0.20                            | 1.00             | 0.94     | 0.10     | 5.00     |
|                     | 7          | 0.20                            | 1.00             | 0.94     | 0.10     | 5.00     |
|                     | 8          | 0.40                            | 1.00             | 0.25     | 1.50     | 1.00     |
|                     | 9          | 0.81                            | 0.10             | 0.25     | 1.40     | 5.00     |
|                     | 10         | 1.00                            | 1.00             | 3.00     | 0.39     | 5.00     |
|                     | 11         | 0.20                            | 0.33             | 3.00     | 0.10     | 5.00     |
|                     | 12         | 0.81                            | 0.10             | 0.25     | 1.40     | 5.00     |
| Mineral             | 13         | 0.80                            | 0.10             | 2.99     | 1.29     | 1.00     |

|                  |    |                     |                 |                       |                   |                                                      |
|------------------|----|---------------------|-----------------|-----------------------|-------------------|------------------------------------------------------|
| <b>nutrients</b> | 14 | 0.40                | 0.10            | 0.25                  | 0.10              | 5.00                                                 |
|                  | 15 | 0.20                | 0.10            | 2.67                  | 1.50              | 4.20                                                 |
|                  | 16 | 1.00                | 0.33            | 0.25                  | 1.50              | 1.00                                                 |
|                  | 17 | 0.61                | 0.64            | 1.90                  | 0.14              | 3.54                                                 |
|                  | 18 | 0.20                | 0.76            | 0.25                  | 0.10              | 1.00                                                 |
|                  | 19 | 0.30                | 1.00            | 3.00                  | 1.22              | 5.00                                                 |
|                  | 20 | 1.00                | 0.10            | 2.38                  | 0.10              | 4.46                                                 |
|                  | 21 | 1.00                | 1.00            | 0.90                  | 1.50              | 4.78                                                 |
|                  | 22 | 0.20                | 0.76            | 0.25                  | 1.50              | 5.00                                                 |
|                  | 23 | 0.20                | 0.76            | 0.25                  | 1.50              | 5.00                                                 |
|                  | 24 | 1.00                | 1.00            | 0.25                  | 0.10              | 3.30                                                 |
|                  | 25 | 1.00                | 0.35            | 1.52                  | 0.94              | 3.10                                                 |
|                  | 26 | 0.20                | 0.76            | 3.00                  | 1.50              | 1.00                                                 |
|                  | 27 | 0.24                | 1.00            | 3.00                  | 0.10              | 2.00                                                 |
|                  | 28 | 0.24                | 1.00            | 3.00                  | 0.10              | 2.00                                                 |
|                  | 29 | 0.20                | 0.76            | 3.00                  | 1.50              | 1.00                                                 |
|                  | 30 | 0.32                | 0.10            | 2.34                  | 0.10              | 1.00                                                 |
|                  | 31 | 0.72                | 0.72            | 0.90                  | 0.69              | 1.00                                                 |
|                  | 32 | 0.20                | 0.10            | 0.80                  | 1.36              | 1.00                                                 |
|                  | 33 | 1.00                | 0.34            | 3.00                  | 1.50              | 5.00                                                 |
|                  | MS | 1.00                | 1.00            | 1.00                  | 1.00              | 1.00                                                 |
|                  |    |                     |                 |                       |                   |                                                      |
|                  |    | <b>Myo-inositol</b> | <b>Thiamine</b> | <b>Nicotinic acid</b> | <b>Pyridoxine</b> | <b>Vitamin E<br/>(mg L<sup>-1</sup>)<sup>1</sup></b> |
| <b>Vitamins</b>  | 1  | 0.00                | 4.00            | 0.00                  | 0.00              | 0.00                                                 |
|                  | 2  | 0.00                | 8.50            | 0.00                  | 3.00              | 1.00                                                 |
|                  | 3  | 0.00                | 0.55            | 8.76                  | 3.00              | 1.00                                                 |
|                  | 4  | 10                  | 10              | 10                    | 0.00              | 0.00                                                 |
|                  | 5  | 10                  | 10              | 0.00                  | 1.78              | 1.00                                                 |
|                  | 6  | 0.00                | 7.40            | 10                    | 0.00              | 0.66                                                 |
|                  | 7  | 10                  | 0.00            | 6.00                  | 3.00              | 0.00                                                 |
|                  | 8  | 0.50                | 0.00            | 0.00                  | 3.00              | 0.26                                                 |
|                  | 9  | 5.95                | 0.00            | 10                    | 0.00              | 1.00                                                 |
|                  | 10 | 0.00                | 7.40            | 10                    | 0.00              | 0.66                                                 |
|                  | 11 | 10                  | 10              | 0.00                  | 1.78              | 1.00                                                 |
|                  | 12 | 0.00                | 10              | 4.76                  | 1.72              | 0.03                                                 |
|                  | 13 | 10                  | 7.15            | 0.00                  | 1.96              | 0.00                                                 |
|                  | 14 | 10                  | 3.05            | 10                    | 1.78              | 0.60                                                 |
|                  | 15 | 10                  | 3.05            | 10                    | 1.78              | 0.60                                                 |
|                  | 16 | 8.75                | 0.55            | 0.00                  | 3.00              | 1.00                                                 |
|                  | 17 | 3.80                | 6.95            | 10                    | 3.00              | 0.00                                                 |
|                  | 18 | 10                  | 10              | 5.00                  | 3.00              | 0.55                                                 |
|                  | 19 | 5.25                | 3.30            | 5.30                  | 0.32              | 0.11                                                 |

|      |         |      |                 |      |      |      |
|------|---------|------|-----------------|------|------|------|
|      | 20      | 4.75 | 4.35            | 4.76 | 1.54 | 0.52 |
|      | 21      | 10   | 10              | 5.00 | 3.00 | 0.55 |
|      | 22      | 4.75 | 4.35            | 4.76 | 1.54 | 0.52 |
|      | 23      | 0.00 | 10              | 4.30 | 1.06 | 1.00 |
|      | 24      | 4.75 | 10              | 0.00 | 0.16 | 0.57 |
|      | 25      | 1.82 | 1.70            | 1.82 | 2.86 | 0.95 |
|      | 26      | 10   | 0.00            | 0.00 | 0.00 | 0.38 |
|      | 27      | 10   | 7.00            | 3.86 | 0.00 | 1.00 |
|      | 28      | 0.00 | 6.05            | 0.00 | 1.92 | 0.38 |
|      | 29      | 0.00 | 0.00            | 0.56 | 0.82 | 1.00 |
|      | 30      | 0.00 | 0.00            | 10   | 1.08 | 0.00 |
|      | 31      | 5.15 | 10              | 10   | 1.68 | 1.00 |
|      | 32      | 5.96 | 6.55            | 0.00 | 3.00 | 0.62 |
|      | 33      | 4.75 | 4.35            | 4.76 | 1.54 | 0.52 |
|      | MS      | 1.00 | 1.00            | 1.00 | 1.00 | –    |
|      |         | BAP  | GA <sub>3</sub> | –    | –    | –    |
| PGRs | 1       | 0.00 | 0.00            | –    | –    | –    |
|      | 2       | 0.50 | 0.00            | –    | –    | –    |
|      | 3       | 1.00 | 0.00            | –    | –    | –    |
|      | 4       | 1.50 | 0.00            | –    | –    | –    |
|      | 5       | 2.00 | 0.00            | –    | –    | –    |
|      | 6       | 2.50 | 0.00            | –    | –    | –    |
|      | 7       | 0.50 | 0.10            | –    | –    | –    |
|      | 8       | 1.00 | 0.10            | –    | –    | –    |
|      | 9       | 1.50 | 0.10            | –    | –    | –    |
|      | 10      | 2.00 | 0.10            | –    | –    | –    |
|      | 11      | 2.50 | 0.10            | –    | –    | –    |
|      | 12      | 0.50 | 0.50            | –    | –    | –    |
|      | 13      | 1.00 | 0.50            | –    | –    | –    |
|      | 14      | 1.50 | 0.50            | –    | –    | –    |
|      | 15      | 2.00 | 0.50            | –    | –    | –    |
|      | 16      | 2.50 | 0.50            | –    | –    | –    |
|      | 17 (MS) | 1.00 | 1.00            | –    | –    | –    |
|      | 18      | 1.50 | 1.00            | –    | –    | –    |
|      | 19      | 2.00 | 1.00            | –    | –    | –    |
|      | 20      | 2.50 | 1.00            | –    | –    | –    |

<sup>1</sup> Vitamin E concentration levels are expressed as mg L<sup>-1</sup>, as the MS medium does not contain this organic compound.

**Table S3.** Macro and micronutrients (expressed as ion concentrations) of the different culture media based on the five-factor experimental design (0-33) and response values of the parameters (average and standard deviation) used to characterize plant growth. Highest values have been highlighted.

| Media | NH <sub>4</sub> <sup>+</sup> | NO <sub>3</sub> <sup>-</sup> | K <sup>+</sup> | Ca <sup>2+</sup> | Mg <sup>2+</sup> | PO <sub>4</sub> <sup>3-</sup> | SO <sub>4</sub> <sup>2-</sup> | Cl <sup>-</sup> | Fe <sup>2+</sup> /EDTA | BO <sub>3</sub> <sup>-</sup> | Mn <sup>2+</sup> | Zn <sup>2+</sup> | Cu <sup>2+</sup> | MoO <sub>4</sub> <sup>2-</sup> | Na <sup>+</sup> | Co <sup>2+</sup> | I <sup>-</sup> | SN               | SL               | LA                 | SQ               | BC        | H         |
|-------|------------------------------|------------------------------|----------------|------------------|------------------|-------------------------------|-------------------------------|-----------------|------------------------|------------------------------|------------------|------------------|------------------|--------------------------------|-----------------|------------------|----------------|------------------|------------------|--------------------|------------------|-----------|-----------|
| 1     | 10.47                        | 22.84                        | 14.44          | 4.95             | 2.48             | 2.06                          | 2.98                          | 9.89            | 0.30                   | 0.15                         | 0.15             | 0.045            | 0.00015          | 0.0015                         | 0.61            | 0.00016          | 0.0075         | 2.7 ± 0.9        | 1.8 ± 0.5        | 20.6 ± 6.3         | 3.8 ± 0.7        | 4.0 ± 0.0 | 2.9 ± 0.5 |
| 2     | 20.61                        | 33.06                        | 15.68          | 7.74             | 3.88             | 3.23                          | 4.00                          | 15.49           | 0.10                   | 0.01                         | 0.01             | 0.003            | 0.00001          | 0.0001                         | 0.20            | 0.00001          | 0.0005         | 2.4 ± 1.4        | 1.9 ± 0.5        | <b>40.7 ± 10.9</b> | 3.2 ± 1.2        | 4.0 ± 0.0 | 1.8 ± 0.9 |
| 3     | 20.61                        | 39.41                        | 21.76          | 7.09             | 3.55             | 2.96                          | 3.86                          | 14.17           | 0.11                   | 0.15                         | 0.15             | 0.045            | 0.00015          | 0.0015                         | 0.22            | 0.00016          | 0.0075         | 1.1 ± 0.7        | 1.4 ± 0.3        | 26.1 ± 12.8        | 4.4 ± 0.7        | 4.0 ± 0.0 | 2.8 ± 0.5 |
| 4     | 4.21                         | 8.62                         | 8.17           | 8.98             | 4.50             | 3.75                          | 4.81                          | 17.96           | 0.18                   | 0.10                         | 0.10             | 0.029            | 0.00010          | 0.0010                         | 0.37            | 0.00010          | 0.0048         | 3.3 ± 1.5        | 1.7 ± 0.4        | 12.0 ± 4.0         | 3.5 ± 0.5        | 4.0 ± 0.0 | 1.8 ± 1.0 |
| 5     | 18.55                        | 20.43                        | 2.19           | 0.75             | 0.38             | 0.31                          | 0.55                          | 1.50            | 0.16                   | 0.01                         | 0.01             | 0.003            | 0.00001          | 0.0001                         | 0.32            | 0.00001          | 0.0005         | 2.9 ± 1.2        | 1.4 ± 0.2        | 7.1 ± 3.4          | 3.1 ± 0.5        | 4.0 ± 0.0 | 3.0 ± 0.0 |
| 6     | 4.12                         | 22.92                        | 19.96          | 2.81             | 1.41             | 1.17                          | 1.92                          | 5.61            | 0.50                   | 0.01                         | 0.01             | 0.003            | 0.00001          | 0.0001                         | 1.00            | 0.00001          | 0.0005         | 0.6 ± 0.9        | 1.4 ± 0.4        | 6.8 ± 3.2          | 2.5 ± 0.9        | 4.0 ± 0.0 | 3.0 ± 0.0 |
| 7     | 4.12                         | 22.92                        | 19.96          | 2.81             | 1.41             | 1.17                          | 1.92                          | 5.61            | 0.50                   | 0.01                         | 0.01             | 0.003            | 0.00001          | 0.0001                         | 1.00            | 0.00001          | 0.0005         | 0.3 ± 0.8        | 1.3 ± 0.4        | 7.8 ± 4.4          | 2.2 ± 0.9        | 4.0 ± 0.0 | 3.0 ± 0.0 |
| 8     | 8.25                         | 27.04                        | 19.11          | 0.75             | 0.38             | 0.31                          | 0.67                          | 1.50            | 0.10                   | 0.15                         | 0.15             | 0.045            | 0.00015          | 0.0015                         | 0.20            | 0.00016          | 0.0075         | <b>3.4 ± 1.6</b> | 1.3 ± 0.2        | 8.7 ± 3.9          | 2.8 ± 0.5        | 3.5 ± 0.5 | 2.9 ± 0.3 |
| 9     | 16.73                        | 18.61                        | 2.20           | 0.75             | 0.38             | 0.31                          | 1.06                          | 1.50            | 0.50                   | 0.14                         | 0.14             | 0.042            | 0.00014          | 0.0014                         | 1.00            | 0.00015          | 0.0070         | 0.3 ± 0.6        | 1.1 ± 0.1        | 3.1 ± 1.7          | 1.7 ± 0.5        | 4.0 ± 0.0 | 3.0 ± 0.0 |
| 10    | 20.61                        | 39.41                        | 22.54          | 8.98             | 4.50             | 3.75                          | 5.05                          | 17.96           | 0.50                   | 0.04                         | 0.04             | 0.012            | 0.00004          | 0.0004                         | 1.00            | 0.00004          | 0.0019         | 0.3 ± 0.5        | 1.3 ± 0.4        | 9.2 ± 3.6          | 2.3 ± 1.0        | 4.0 ± 0.0 | 2.2 ± 1.0 |
| 11    | 4.21                         | 10.31                        | 9.86           | 8.98             | 4.50             | 3.75                          | 5.02                          | 17.96           | 0.50                   | 0.01                         | 0.01             | 0.003            | 0.00001          | 0.0001                         | 1.00            | 0.00001          | 0.0005         | 1.0 ± 0.9        | 1.3 ± 0.2        | 6.0 ± 2.1          | 1.7 ± 0.7        | 4.0 ± 0.0 | 1.9 ± 1.0 |
| 12    | 16.73                        | 18.61                        | 2.20           | 0.75             | 0.38             | 0.31                          | 1.06                          | 1.50            | 0.50                   | 0.14                         | 0.14             | 0.042            | 0.00014          | 0.0014                         | 1.00            | 0.00015          | 0.0070         | 0.4 ± 0.7        | 1.2 ± 0.2        | 3.8 ± 1.2          | 1.5 ± 0.5        | 3.1 ± 0.2 | 3.0 ± 0.0 |
| 13    | 16.57                        | 18.45                        | 5.62           | 8.94             | 4.48             | 3.73                          | 4.75                          | 17.88           | 0.10                   | 0.13                         | 0.13             | 0.039            | 0.00013          | 0.0013                         | 0.20            | 0.00014          | 0.0064         | 2.6 ± 1.0        | 1.7 ± 0.4        | 17.0 ± 5.5         | 3.6 ± 0.7        | 4.0 ± 0.0 | 1.9 ± 0.7 |
| 14    | 8.16                         | 10.04                        | 2.19           | 0.75             | 0.38             | 0.31                          | 0.89                          | 1.50            | 0.50                   | 0.01                         | 0.01             | 0.003            | 0.00001          | 0.0001                         | 1.00            | 0.00001          | 0.0005         | 0.1 ± 0.3        |                  |                    |                  |           |           |
| 15    | 4.12                         | 6.00                         | 5.22           | 7.99             | 4.01             | 3.34                          | 4.62                          | 15.98           | 0.42                   | 0.15                         | 0.15             | 0.045            | 0.00015          | 0.0015                         | 0.84            | 0.00016          | 0.0075         | 0.3 ± 0.5        | 1.2 ± 0.0        | 4.1 ± 1.8          | 1.3 ± 0.6        | 4.0 ± 0.0 | 2.9 ± 0.3 |
| 16    | 20.61                        | 26.89                        | 6.60           | 0.75             | 0.38             | 0.31                          | 0.67                          | 1.50            | 0.10                   | 0.15                         | 0.15             | 0.045            | 0.00015          | 0.0015                         | 0.20            | 0.00016          | 0.0075         | 2.9 ± 1.4        | 1.8 ± 0.4        | 14.0 ± 3.4         | 3.1 ± 0.6        | 3.9 ± 0.2 | 2.6 ± 0.7 |
| 17    | 12.66                        | 24.76                        | 14.47          | 5.69             | 2.85             | 2.37                          | 3.23                          | 11.37           | 0.35                   | 0.01                         | 0.01             | 0.004            | 0.00001          | 0.0001                         | 0.71            | 0.00001          | 0.0007         | 0.3 ± 0.6        | 1.3 ± 0.2        | 8.7 ± 2.3          | 2.3 ± 0.9        | 4.0 ± 0.0 | 3.0 ± 0.0 |
| 18    | 4.12                         | 18.35                        | 14.54          | 0.75             | 0.38             | 0.31                          | 0.49                          | 1.50            | 0.10                   | 0.01                         | 0.01             | 0.003            | 0.00001          | 0.0001                         | 0.20            | 0.00001          | 0.0005         | 2.7 ± 0.8        | 1.6 ± 0.3        | 8.8 ± 2.8          | 2.9 ± 0.5        | 2.0 ± 0.0 | 2.9 ± 0.3 |
| 19    | 6.26                         | 25.05                        | 22.55          | 8.98             | 4.50             | 3.75                          | 5.16                          | 17.96           | 0.50                   | 0.12                         | 0.12             | 0.036            | 0.00012          | 0.0013                         | 1.00            | 0.00013          | 0.0061         | 0.8 ± 0.9        | 1.6 ± 0.4        | 14.5 ± 6.4         | 3.4 ± 1.0        | 4.0 ± 0.0 | 2.7 ± 0.8 |
| 20    | 20.61                        | 22.49                        | 4.85           | 7.13             | 3.57             | 2.97                          | 4.03                          | 14.25           | 0.45                   | 0.01                         | 0.01             | 0.003            | 0.00001          | 0.0001                         | 0.89            | 0.00001          | 0.0005         | 0.2 ± 0.4        | 1.5 ± 0.3        | 6.1 ± 3.7          | 2.1 ± 0.7        | 4.0 ± 0.0 | 2.9 ± 0.3 |
| 21    | 20.61                        | 39.41                        | 19.92          | 2.68             | 1.35             | 1.12                          | 2.02                          | 5.37            | 0.48                   | 0.15                         | 0.150            | 0.045            | 0.00015          | 0.0015                         | 0.96            | 0.00016          | 0.0075         | 0.0 ± 0.0        |                  |                    |                  |           |           |
| 22    | 4.12                         | 18.35                        | 14.55          | 0.75             | 0.38             | 0.31                          | 1.07                          | 1.50            | 0.50                   | 0.15                         | 0.15             | 0.045            | 0.00015          | 0.0015                         | 1.00            | 0.00016          | 0.0075         | 1.4 ± 0.7        | 1.2 ± 0.2        | 4.1 ± 1.4          | 1.7 ± 0.5        | 1.0 ± 0.0 | 3.0 ± 0.0 |
| 23    | 4.12                         | 18.35                        | 14.55          | 0.75             | 0.38             | 0.31                          | 1.07                          | 1.50            | 0.50                   | 0.15                         | 0.15             | 0.045            | 0.00015          | 0.0015                         | 1.00            | 0.00016          | 0.0075         | 0.9 ± 1.0        | 1.1 ± 0.1        | 4.0 ± 1.6          | 1.7 ± 0.5        | 1.2 ± 0.7 | 3.0 ± 0.0 |
| 24    | 20.61                        | 39.41                        | 19.11          | 0.75             | 0.38             | 0.31                          | 0.72                          | 1.50            | 0.33                   | 0.01                         | 0.01             | 0.003            | 0.00001          | 0.0001                         | 0.66            | 0.00001          | 0.0005         | 1.2 ± 0.9        | 1.5 ± 0.4        | 4.7 ± 2.0          | 1.9 ± 0.8        | 4.0 ± 0.0 | 2.6 ± 0.9 |
| 25    | 20.61                        | 27.14                        | 8.43           | 4.53             | 2.27             | 1.89                          | 2.71                          | 9.07            | 0.31                   | 0.09                         | 0.09             | 0.028            | 0.00009          | 0.0010                         | 0.62            | 0.00010          | 0.0047         | 1.9 ± 0.6        | 1.8 ± 0.4        | 16.2 ± 5.3         | 3.7 ± 0.7        | 4.0 ± 0.0 | 2.9 ± 0.5 |
| 26    | 4.12                         | 18.43                        | 18.07          | 8.98             | 4.50             | 3.75                          | 4.80                          | 17.96           | 0.10                   | 0.15                         | 0.15             | 0.045            | 0.00015          | 0.0015                         | 0.20            | 0.00016          | 0.0075         | 0.7 ± 0.8        | 1.9 ± 0.9        | 21.7 ± 10.3        | 4.2 ± 0.8        | 3.6 ± 0.5 | 2.8 ± 0.4 |
| 27    | 4.95                         | 23.74                        | 22.54          | 8.98             | 4.50             | 3.75                          | 4.72                          | 17.96           | 0.20                   | 0.01                         | 0.01             | 0.003            | 0.00001          | 0.0001                         | 0.40            | 0.00001          | 0.0005         | 2.1 ± 1.2        | 1.7 ± 0.4        | 28.5 ± 8.5         | 3.9 ± 0.9        | 4.0 ± 0.0 | 1.4 ± 0.7 |
| 28    | 4.95                         | 23.74                        | 22.54          | 8.98             | 4.50             | 3.75                          | 4.72                          | 17.96           | 0.20                   | 0.01                         | 0.01             | 0.003            | 0.00001          | 0.0001                         | 0.40            | 0.00001          | 0.0005         | 1.8 ± 1.1        | 2.0 ± 0.6        | 29.9 ± 13.8        | 4.1 ± 0.8        | 4.0 ± 0.0 | 1.8 ± 0.7 |
| 29    | 4.12                         | 18.43                        | 18.07          | 8.98             | 4.50             | 3.75                          | 4.80                          | 17.96           | 0.10                   | 0.15                         | 0.15             | 0.045            | 0.00015          | 0.0015                         | 0.20            | 0.00016          | 0.0075         | 1.0 ± 1.0        | 1.8 ± 0.6        | 18.9 ± 9.3         | 3.5 ± 1.2        | 3.7 ± 0.5 | 2.4 ± 0.8 |
| 30    | 6.51                         | 8.39                         | 4.80           | 7.00             | 3.51             | 2.92                          | 3.63                          | 14.01           | 0.10                   | 0.01                         | 0.01             | 0.003            | 0.00001          | 0.0001                         | 0.20            | 0.00001          | 0.0005         | 2.1 ± 1.4        | 1.5 ± 0.3        | 9.3 ± 3.9          | 1.4 ± 0.5        | 4.0 ± 0.0 | 1.0 ± 0.0 |
| 31    | 14.92                        | 28.46                        | 14.67          | 2.68             | 1.35             | 1.12                          | 1.54                          | 5.36            | 0.10                   | 0.07                         | 0.07             | 0.021            | 0.00007          | 0.0007                         | 0.20            | 0.00007          | 0.0034         | 2.1 ± 1.0        | <b>2.1 ± 0.7</b> | 28.3 ± 9.3         | <b>4.7 ± 0.5</b> | 4.0 ± 0.0 | 2.7 ± 0.5 |
| 32    | 4.12                         | 6.00                         | 2.89           | 2.39             | 1.20             | 1.00                          | 1.48                          | 4.79            | 0.10                   | 0.14                         | 0.14             | 0.041            | 0.00014          | 0.0014                         | 0.20            | 0.00014          | 0.0068         | 1.3 ± 1.1        | 1.3 ± 0.3        | 5.7 ± 2.9          | 2.4 ± 0.8        | 4.0 ± 0.0 | 2.9 ± 0.3 |
| 33    | 20.61                        | 26.98                        | 10.12          | 8.98             | 4.50             | 3.75                          | 5.20                          | 17.96           | 0.50                   | 0.15                         | 0.15             | 0.045            | 0.00015          | 0.0015                         | 1.00            | 0.00016          | 0.0075         | 0.6 ± 1.0        | 1.6 ± 0.4        | 10.4 ± 5.5         | 2.6 ± 0.8        | 4.0 ± 0.0 | 2.4 ± 0.9 |
| MS    | 20.61                        | 39.41                        | 20.05          | 2.99             | 1.50             | 1.25                          | 1.73                          | 5.99            | 0.10                   | 0.10                         | 0.10             | 0.030            | 0.00010          | 0.0010                         | 0.20            | 0.00011          | 0.0050         | 1.9 ± 1.1        | 1.6 ± 0.3        | 28.7 ± 9.3         | 4.1 ± 0.4        | 4.0 ± 0.0 | 2.6 ± 0.6 |

**Table S4.** Vitamin concentration of the different culture media based on the five-factor experimental design (0-33) and response values of the parameters (average and standard deviation) used to characterize plant growth. Highest values have been highlighted.

| Media | Myo  | Thia  | Nic  | Pyr  | VitE | Gly | SN               | SL               | LA                | SQ        | BC        | H         |
|-------|------|-------|------|------|------|-----|------------------|------------------|-------------------|-----------|-----------|-----------|
| 1     | 0    | 4.00  | 0.00 | 0.00 | 0.00 | 2.0 | 1.7 ± 0.7        | 1.4 ± 0.2        | 20.5 ± 6.2        | 3.8 ± 0.7 | 4.0 ± 0.0 | 2.9 ± 0.5 |
| 2     | 0    | 8.50  | 0.00 | 1.50 | 1.00 | 2.0 | 2.3 ± 0.7        | 1.6 ± 0.3        | 25.5 ± 5.2        | 3.9 ± 0.4 | 4.0 ± 0.0 | 2.9 ± 0.4 |
| 3     | 0    | 0.55  | 4.38 | 1.50 | 1.00 | 2.0 | <b>2.4 ± 1.5</b> | 1.5 ± 0.4        | 26.3 ± 6.9        | 3.9 ± 0.3 | 4.0 ± 0.0 | 2.6 ± 0.6 |
| 4     | 1000 | 10.00 | 5.00 | 0.00 | 0.00 | 2.0 | 1.4 ± 0.8        | 1.4 ± 0.2        | 19.5 ± 7.7        | 3.7 ± 0.6 | 4.0 ± 0.0 | 2.8 ± 0.6 |
| 5     | 1000 | 10.00 | 0.00 | 0.89 | 1.00 | 2.0 | 2.1 ± 1.2        | <b>1.8 ± 0.4</b> | <b>27.7 ± 5.7</b> | 4.3 ± 0.5 | 4.0 ± 0.0 | 2.8 ± 0.4 |
| 6     | 0    | 7.40  | 5.00 | 0.00 | 0.66 | 2.0 | 2.1 ± 1.2        | 1.7 ± 0.3        | 23.1 ± 7.5        | 4.3 ± 0.8 | 4.0 ± 0.0 | 2.6 ± 0.7 |
| 7     | 1000 | 0.00  | 3.00 | 1.50 | 0.00 | 2.0 | 1.9 ± 1.1        | 1.5 ± 0.3        | 17.2 ± 5.9        | 3.7 ± 0.6 | 4.0 ± 0.0 | 2.7 ± 0.7 |
| 8     | 50   | 0.00  | 0.00 | 1.50 | 0.26 | 2.0 | 1.8 ± 0.7        | 1.7 ± 0.4        | 21.8 ± 4.8        | 4.3 ± 0.5 | 4.0 ± 0.0 | 2.9 ± 0.3 |
| 9     | 595  | 0.00  | 5.00 | 0.00 | 1.00 | 2.0 | 1.9 ± 0.7        | 1.4 ± 0.3        | 19.6 ± 3.7        | 4.0 ± 0.8 | 4.0 ± 0.0 | 2.7 ± 0.7 |
| 10    | 0    | 7.40  | 5.00 | 0.00 | 0.66 | 2.0 | 2.1 ± 0.9        | 1.6 ± 0.4        | 26.2 ± 6.5        | 4.0 ± 0.9 | 4.0 ± 0.0 | 2.7 ± 0.7 |
| 11    | 1000 | 10.00 | 0.00 | 0.89 | 1.00 | 2.0 | 1.9 ± 1.1        | 1.4 ± 0.2        | 24.3 ± 6.6        | 4.3 ± 0.6 | 4.0 ± 0.0 | 2.8 ± 0.4 |
| 12    | 0    | 10.00 | 2.38 | 0.86 | 0.03 | 2.0 | 1.5 ± 0.9        | 1.6 ± 0.2        | 18.8 ± 6.7        | 3.6 ± 0.8 | 4.0 ± 0.0 | 2.5 ± 0.8 |
| 13    | 1000 | 7.15  | 0.00 | 0.98 | 0.00 | 2.0 | 2.2 ± 1.0        | 1.6 ± 0.4        | 27.3 ± 12         | 4.0 ± 0.8 | 4.0 ± 0.0 | 2.5 ± 0.8 |
| 14    | 1000 | 3.05  | 5.00 | 0.89 | 0.60 | 2.0 | 2.0 ± 0.8        | 1.6 ± 0.4        | 26.1 ± 5.4        | 4.5 ± 0.6 | 4.0 ± 0.0 | 2.8 ± 0.6 |
| 15    | 1000 | 3.05  | 5.00 | 0.89 | 0.60 | 2.0 | 2.1 ± 1.0        | 1.6 ± 0.4        | 22.1 ± 5.5        | 4.2 ± 0.4 | 4.0 ± 0.0 | 2.9 ± 0.5 |
| 16    | 875  | 0.55  | 0.00 | 1.50 | 1.00 | 2.0 | 2.1 ± 1.0        | 1.4 ± 0.3        | 26.3 ± 6.4        | 4.1 ± 0.6 | 4.0 ± 0.0 | 2.7 ± 0.6 |
| 17    | 380  | 6.95  | 5.00 | 1.50 | 0.00 | 2.0 | 1.6 ± 0.7        | 1.6 ± 0.4        | 20.5 ± 4.8        | 4.1 ± 0.5 | 4.0 ± 0.0 | 2.7 ± 0.7 |
| 18    | 1000 | 10.00 | 2.50 | 1.50 | 0.55 | 2.0 | 2.0 ± 1.1        | 1.5 ± 0.3        | 24.4 ± 7.1        | 4.1 ± 1.1 | 4.0 ± 0.0 | 2.6 ± 0.8 |
| 19    | 525  | 3.30  | 2.65 | 0.16 | 0.11 | 2.0 | 1.9 ± 0.8        | 1.6 ± 0.4        | 26.7 ± 6.5        | 4.2 ± 0.8 | 4.0 ± 0.0 | 2.5 ± 0.8 |
| 20    | 475  | 4.35  | 2.38 | 0.77 | 0.52 | 2.0 | 2.2 ± 0.9        | 1.4 ± 0.3        | 26.1 ± 3.8        | 4.5 ± 0.5 | 4.0 ± 0.0 | 2.9 ± 0.4 |
| 21    | 1000 | 10.00 | 2.50 | 1.50 | 0.55 | 2.0 | 2.0 ± 1.0        | 1.3 ± 0.2        | 25.4 ± 7.8        | 4.2 ± 0.6 | 4.0 ± 0.0 | 2.9 ± 0.3 |
| 22    | 475  | 4.35  | 2.38 | 0.77 | 0.52 | 2.0 | 1.8 ± 0.9        | 1.4 ± 0.2        | 24.9 ± 7.1        | 4.5 ± 0.5 | 4.0 ± 0.0 | 2.9 ± 0.3 |
| 23    | 0    | 10.00 | 2.15 | 0.53 | 1.00 | 2.0 | 1.5 ± 1.0        | 1.3 ± 0.2        | 15.9 ± 5.4        | 3.8 ± 0.7 | 4.0 ± 0.0 | 3.0 ± 0.0 |
| 24    | 475  | 10.00 | 0.00 | 0.08 | 0.57 | 2.0 | 1.8 ± 1.3        | 1.6 ± 0.5        | 16.6 ± 7.2        | 3.9 ± 1.1 | 4.0 ± 0.0 | 2.7 ± 0.7 |
| 25    | 182  | 1.70  | 0.91 | 1.43 | 0.95 | 2.0 | 1.7 ± 1.2        | 1.6 ± 0.3        | 15.4 ± 7.1        | 3.9 ± 1.0 | 4.0 ± 0.0 | 2.9 ± 0.5 |
| 26    | 1000 | 0.00  | 0.00 | 0.00 | 0.38 | 2.0 | 1.3 ± 0.9        | 1.4 ± 0.4        | 14.2 ± 6.0        | 3.7 ± 1.0 | 4.0 ± 0.0 | 2.7 ± 0.7 |
| 27    | 1000 | 7.00  | 1.93 | 0.00 | 1.00 | 2.0 | 1.2 ± 1.1        | 1.4 ± 0.2        | 14.8 ± 6.3        | 3.8 ± 0.8 | 4.0 ± 0.0 | 2.9 ± 0.4 |
| 28    | 0    | 6.05  | 0.00 | 0.96 | 0.38 | 2.0 | 2.2 ± 1.2        | 1.6 ± 0.3        | 20.7 ± 8.2        | 4.3 ± 0.9 | 4.0 ± 0.0 | 3.0 ± 0.0 |
| 29    | 0    | 0.00  | 0.28 | 0.41 | 1.00 | 2.0 | 1.9 ± 1.2        | 1.4 ± 0.2        | 21.4 ± 6.0        | 4.4 ± 0.5 | 4.0 ± 0.0 | 3.0 ± 0.0 |
| 30    | 0    | 0.00  | 5.00 | 0.54 | 0.00 | 2.0 | 1.5 ± 1.0        | 1.6 ± 0.3        | 22.1 ± 7.5        | 4.5 ± 0.8 | 4.0 ± 0.0 | 2.9 ± 0.3 |
| 31    | 515  | 10.00 | 5.00 | 0.84 | 1.00 | 2.0 | 1.7 ± 0.9        | 1.4 ± 0.3        | 22.0 ± 5.2        | 4.5 ± 0.5 | 4.0 ± 0.0 | 3.0 ± 0.0 |
| 32    | 596  | 6.55  | 0.00 | 1.50 | 0.62 | 2.0 | 1.4 ± 0.9        | 1.3 ± 0.3        | 20.9 ± 6.2        | 4.0 ± 0.5 | 4.0 ± 0.0 | 2.9 ± 0.3 |
| 33    | 475  | 4.35  | 2.38 | 0.77 | 0.52 | 2.0 | 1.7 ± 1.0        | 1.5 ± 0.4        | 25.3 ± 10.7       | 4.0 ± 0.5 | 4.0 ± 0.0 | 2.7 ± 0.7 |
| MS    | 100  | 0.10  | 0.50 | 0.50 | 0.00 | 2.0 | 1.8 ± 1.0        | 1.6 ± 0.4        | 22.1 ± 8.0        | 4.1 ± 0.7 | 4.0 ± 0.0 | 2.9 ± 0.4 |

**Table S5.** PGRs combinations of the different culture media and response values of the parameters (average and standard deviation) used to characterize plant growth. Highest values have been highlighted.

| Media    | GA3  | BAP  | SN               | SL               | LA                | SQ               | BC        | H         |
|----------|------|------|------------------|------------------|-------------------|------------------|-----------|-----------|
| H1       | 0.00 | 0.00 | 0.0 ± 0.0        |                  |                   |                  |           |           |
| H2       | 0.00 | 0.50 | 0.8 ± 0.8        | 1.5 ± 0.6        | 32.4 ± 13.1       | 3.9 ± 0.8        | 4.0 ± 0.0 | 2.8 ± 0.6 |
| H3       | 0.00 | 1.00 | 0.8 ± 1.1        | 1.6 ± 0.3        | 32.6 ± 16.3       | 3.3 ± 1.0        | 4.0 ± 0.0 | 2.7 ± 0.7 |
| H4       | 0.00 | 1.50 | 1.8 ± 1.0        | 1.6 ± 0.9        | 33.6 ± 12.0       | 3.8 ± 0.6        | 4.0 ± 0.0 | 2.9 ± 0.3 |
| H5       | 0.00 | 2.00 | 1.3 ± 0.5        | 1.3 ± 0.3        | <b>34.7 ± 7.0</b> | 4.0 ± 0.7        | 4.0 ± 0.0 | 2.8 ± 0.6 |
| H6       | 0.00 | 2.50 | 1.3 ± 1.1        | 1.5 ± 0.3        | 28.8 ± 10.1       | 3.5 ± 0.7        | 4.0 ± 0.0 | 2.5 ± 0.8 |
| H7       | 0.10 | 0.50 | 1.3 ± 1.1        | 2.1 ± 0.9        | 31.5 ± 7.1        | 3.9 ± 0.5        | 4.0 ± 0.0 | 2.7 ± 0.8 |
| H8       | 0.10 | 1.00 | 0.9 ± 1.3        | 1.4 ± 0.3        | 31.5 ± 8.0        | 3.8 ± 0.4        | 4.0 ± 0.0 | 2.9 ± 0.3 |
| H9       | 0.10 | 1.50 | 0.9 ± 1.1        | 1.4 ± 0.1        | 27.2 ± 9.3        | 3.3 ± 0.7        | 4.0 ± 0.0 | 2.7 ± 0.7 |
| H10      | 0.10 | 2.00 | 1.5 ± 1.1        | 1.6 ± 0.4        | 30.3 ± 9.1        | 3.8 ± 0.6        | 4.0 ± 0.0 | 2.5 ± 0.8 |
| H11      | 0.10 | 2.50 | 1.1 ± 1.1        | 1.2 ± 0.3        | 24.3 ± 6.6        | 3.4 ± 0.7        | 4.0 ± 0.0 | 2.3 ± 1.0 |
| H12      | 0.50 | 0.50 | 0.7 ± 0.9        | 1.5 ± 0.3        | 30.3 ± 9.7        | 3.9 ± 0.9        | 4.0 ± 0.0 | 2.7 ± 0.7 |
| H13      | 0.50 | 1.00 | 1.0 ± 1.0        | 1.7 ± 0.3        | 26.5 ± 10.7       | 3.5 ± 1.2        | 4.0 ± 0.0 | 2.5 ± 0.9 |
| H14      | 0.50 | 1.50 | 1.2 ± 1.0        | 1.8 ± 0.5        | 27.0 ± 5.3        | <b>4.3 ± 0.6</b> | 4.0 ± 0.0 | 2.8 ± 0.6 |
| H15      | 0.50 | 2.00 | 0.8 ± 0.9        | 1.4 ± 0.1        | 28.9 ± 4.3        | 3.9 ± 0.3        | 4.0 ± 0.0 | 3.0 ± 0.0 |
| H16      | 0.50 | 2.50 | 1.3 ± 0.9        | 1.7 ± 0.4        | 25.3 ± 5.1        | 3.7 ± 0.9        | 4.0 ± 0.0 | 2.5 ± 0.9 |
| H17 (MS) | 1.00 | 1.00 | 1.5 ± 1.2        | 2.0 ± 0.6        | 24.0 ± 5.1        | 3.8 ± 0.8        | 4.0 ± 0.0 | 2.8 ± 0.6 |
| H18      | 1.00 | 1.50 | 1.8 ± 1.4        | <b>2.3 ± 0.7</b> | 19.6 ± 3.7        | 3.4 ± 1.1        | 4.0 ± 0.0 | 2.4 ± 0.9 |
| H19      | 1.00 | 2.00 | 1.5 ± 1.5        | 1.7 ± 0.3        | 22.9 ± 7.0        | 3.7 ± 0.6        | 4.0 ± 0.0 | 2.6 ± 0.7 |
| H20      | 1.00 | 2.50 | <b>2.7 ± 2.4</b> | 1.8 ± 0.5        | 21.3 ± 7.2        | 3.3 ± 0.8        | 4.0 ± 0.0 | 2.4 ± 0.9 |
